# Supplementary material for: An Evaluation of the Potential of Essential Oils against SARS-CoV-2 from In Silico Studies through the Systematic Review Using a Chemometric Approach
Source: Pharmaceuticals (Basel). 2021 Nov 10;14(11):1138. doi: 10.3390/ph14111138 (PMC8624289; doi:10.3390/ph14111138)
Supplement: Supplementary file 1 [file pharmaceuticals-14-01138-s001.zip › Supplementary file 2.pdf]

## Supplementary file 2

**Table S1** Pharmacokinetic and toxicology properties of essential oil (EO) compounds and reference drugs obtained through the ADMETlab server (<http://admet.scbdd.com/>).

| EO compounds                          | Absorption          |                |                | Distribution |      |      |      | Metabolism            |                       |                       |                       |                       |                       |                        |                        |                       |                       | Excretion |       | Toxicity |        |       |
|---------------------------------------|---------------------|----------------|----------------|--------------|------|------|------|-----------------------|-----------------------|-----------------------|-----------------------|-----------------------|-----------------------|------------------------|------------------------|-----------------------|-----------------------|-----------|-------|----------|--------|-------|
|                                       | Caco-2 permeability | Pgp-inhibitor* | Pgp-substrate* | HIA*         | PPB  | BBB* | VD   | CYP450 1A2 inhibitor* | CYP450 1A2 substrate* | CYP450 3A4 inhibitor* | CYP450 3A4 substrate* | CYP450 2C9 inhibitor* | CYP450 2C9 substrate* | CYP450 2C19 inhibitor* | CYP450 2C19 substrate* | CYP450 2D6 inhibitor* | CYP450 2D6 substrate* | T 1/2     | hERG* | Ames*    | LD50   | DILI* |
| (E)-B-Santalol                        | -4.40               | 0.57           | 0.05           | 0.86         | 85.6 | 0.95 | 0.29 | 0.02                  | 0.39                  | 0.07                  | 0.50                  | 0.08                  | 0.39                  | 0.23                   | 0.56                   | 0.31                  | 0.54                  | 1.67      | 0.38  | 0.20     | 1914.8 | 0.21  |
| (Z)-Alpha-Santalol                    | -4.45               | 0.73           | 0.07           | 0.07         | 83.5 | 0.88 | 0.52 | 0.03                  | 0.42                  | 0.05                  | 0.51                  | 0.16                  | 0.28                  | 0.13                   | 0.53                   | 0.32                  | 0.45                  | 1.84      | 0.38  | 0.29     | 1180.1 | 0.18  |
| (Z)-Beta-Santalol                     | -4.40               | 0.57           | 0.05           | 0.86         | 85.6 | 0.95 | 0.29 | 0.02                  | 0.39                  | 0.07                  | 0.50                  | 0.08                  | 0.39                  | 0.23                   | 0.56                   | 0.31                  | 0.54                  | 1.67      | 0.38  | 0.20     | 1914.8 | 0.21  |
| 10-epi-Acor-3-em-5-one                | -4.38               | 0.56           | 0.04           | 0.85         | 80.4 | 0.95 | 0.37 | 0.13                  | 0.39                  | 0.03                  | 0.61                  | 0.03                  | 0.40                  | 0.18                   | 0.50                   | 0.25                  | 0.27                  | 1.64      | 0.30  | 0.02     | 1552.9 | 0.45  |
| 7,11-Epoxy-cremophila-1,9-dien-8-a-ol | -4.41               | 0.19           | 0.12           | 0.81         | 71.8 | 0.95 | 0.39 | 0.10                  | 0.32                  | 0.05                  | 0.46                  | 0.07                  | 0.34                  | 0.22                   | 0.54                   | 0.27                  | 0.39                  | 1.68      | 0.42  | 0.44     | 924.4  | 0.36  |
| Allo-khusiol                          | -4.42               | 0.12           | 0.08           | 0.91         | 75.8 | 0.96 | 0.55 | 0.02                  | 0.24                  | 0.02                  | 0.40                  | 0.02                  | 0.28                  | 0.10                   | 0.38                   | 0.23                  | 0.32                  | 1.60      | 0.32  | 0.08     | 1738.1 | 0.13  |
| Alpha-Bisabolol oxide B               | -4.45               | 0.51           | 0.02           | 0.81         | 79.4 | 0.98 | 0.39 | 0.11                  | 0.43                  | 0.08                  | 0.65                  | 0.08                  | 0.42                  | 0.22                   | 0.53                   | 0.40                  | 0.46                  | 1.57      | 0.38  | 0.18     | 1902.2 | 0.25  |
| Alpha-vetispirene                     | -4.46               | 0.31           | 0.04           | 0.86         | 71.1 | 0.97 | 0.52 | 0.19                  | 0.48                  | 0.06                  | 0.56                  | 0.06                  | 0.39                  | 0.24                   | 0.53                   | 0.38                  | 0.42                  | 1.99      | 0.39  | 0.07     | 3476.0 | 0.27  |
| Beta-sesquiphellandrene               | -4.45               | 0.58           | 0.03           | 0.83         | 78.7 | 0.92 | 0.44 | 0.10                  | 0.32                  | 0.02                  | 0.56                  | 0.04                  | 0.35                  | 0.14                   | 0.52                   | 0.34                  | 0.48                  | 1.79      | 0.46  | 0.05     | 5500.4 | 0.21  |
| Bisabolol                             | -4.42               | 0.64           | 0.03           | 0.89         | 86.0 | 0.86 | 0.40 | 0.06                  | 0.26                  | 0.06                  | 0.53                  | 0.07                  | 0.40                  | 0.34                   | 0.43                   | 0.36                  | 0.54                  | 1.58      | 0.45  | 0.14     | 3460.0 | 0.15  |
| Cadin-4-em-10-ol                      | -4.42               | 0.46           | 0.09           | 0.91         | 80.1 | 0.95 | 0.49 | 0.02                  | 0.49                  | 0.04                  | 0.64                  | 0.03                  | 0.33                  | 0.22                   | 0.61                   | 0.35                  | 0.42                  | 1.61      | 0.35  | 0.04     | 1879.6 | 0.21  |
| Caryophyllene oxide                   | -4.41               | 0.25           | 0.01           | 0.78         | 78.5 | 0.99 | 0.60 | 0.09                  | 0.39                  | 0.04                  | 0.63                  | 0.03                  | 0.28                  | 0.08                   | 0.65                   | 0.32                  | 0.37                  | 1.93      | 0.32  | 0.05     | 1422.8 | 0.32  |
| Cedrane                               | -4.44               | 0.25           | 0.17           | 0.86         | 70.7 | 0.98 | 0.62 | 0.04                  | 0.46                  | 0.09                  | 0.46                  | 0.03                  | 0.34                  | 0.11                   | 0.54                   | 0.30                  | 0.46                  | 1.98      | 0.34  | 0.20     | 2504.1 | 0.18  |
| Costunolide                           | -4.29               | 0.51           | 0.03           | 0.75         | 76.4 | 0.99 | 0.07 | 0.12                  | 0.54                  | 0.06                  | 0.58                  | 0.04                  | 0.46                  | 0.20                   | 0.71                   | 0.24                  | 0.32                  | 1.50      | 0.46  | 0.11     | 2748.4 | 0.51  |
| Cubebol                               | -4.41               | 0.27           | 0.13           | 0.89         | 75.7 | 0.82 | 0.63 | 0.03                  | 0.36                  | 0.15                  | 0.50                  | 0.05                  | 0.18                  | 0.09                   | 0.39                   | 0.23                  | 0.38                  | 1.73      | 0.34  | 0.19     | 1588.8 | 0.16  |
| Curcumol                              | -4.43               | 0.28           | 0.11           | 0.81         | 75.1 | 0.76 | 0.27 | 0.13                  | 0.35                  | 0.08                  | 0.40                  | 0.08                  | 0.27                  | 0.18                   | 0.47                   | 0.31                  | 0.36                  | 1.62      | 0.27  | 0.18     | 1323.0 | 0.31  |
| Curione                               | -4.31               | 0.42           | 0.29           | 0.74         | 79.5 | 0.94 | 0.11 | 0.10                  | 0.57                  | 0.02                  | 0.46                  | 0.04                  | 0.31                  | 0.06                   | 0.51                   | 0.23                  | 0.38                  | 1.56      | 0.38  | 0.09     | 2379.9 | 0.35  |
| Cyclocopacamphenol                    | -4.40               | 0.44           | 0.04           | 0.87         | 70.8 | 0.94 | 0.56 | 0.01                  | 0.35                  | 0.10                  | 0.49                  | 0.04                  | 0.22                  | 0.04                   | 0.47                   | 0.29                  | 0.28                  | 1.78      | 0.33  | 0.31     | 1233.5 | 0.18  |
| Epizizanone                           | -4.36               | 0.18           | 0.04           | 0.86         | 77.6 | 0.97 | 0.38 | 0.02                  | 0.44                  | 0.07                  | 0.59                  | 0.02                  | 0.29                  | 0.06                   | 0.57                   | 0.20                  | 0.28                  | 1.75      | 0.30  | 0.06     | 1611.1 | 0.43  |
| Eremanthin                            | -4.31               | 0.32           | 0.03           | 0.76         | 69.4 | 0.99 | 0.06 | 0.16                  | 0.49                  | 0.07                  | 0.55                  | 0.03                  | 0.41                  | 0.13                   | 0.65                   | 0.28                  | 0.37                  | 1.34      | 0.29  | 0.15     | 800.4  | 0.51  |

|                      |       |      |      |      |      |      |      |      |      |      |      |      |      |      |      |      |      |      |      |      |        |      |
|----------------------|-------|------|------|------|------|------|------|------|------|------|------|------|------|------|------|------|------|------|------|------|--------|------|
| Eudesmol             | -4.44 | 0.21 | 0.01 | 0.90 | 78.6 | 0.98 | 0.38 | 0.03 | 0.40 | 0.12 | 0.64 | 0.07 | 0.35 | 0.22 | 0.52 | 0.32 | 0.33 | 1.62 | 0.34 | 0.06 | 1754.2 | 0.22 |
| Guaiol               | -4.45 | 0.44 | 0.02 | 0.84 | 80.5 | 0.96 | 0.42 | 0.08 | 0.36 | 0.04 | 0.46 | 0.08 | 0.21 | 0.30 | 0.45 | 0.34 | 0.43 | 1.61 | 0.32 | 0.15 | 2018.7 | 0.23 |
| Himachalol           | -4.44 | 0.37 | 0.01 | 0.88 | 80.9 | 0.99 | 0.49 | 0.10 | 0.45 | 0.07 | 0.71 | 0.01 | 0.34 | 0.25 | 0.59 | 0.38 | 0.40 | 1.62 | 0.34 | 0.13 | 1412.8 | 0.20 |
| Isokhusenic acid     | -4.56 | 0.18 | 0.01 | 0.85 | 80.3 | 0.85 | 0.27 | 0.01 | 0.30 | 0.02 | 0.59 | 0.02 | 0.28 | 0.07 | 0.48 | 0.22 | 0.33 | 1.56 | 0.30 | 0.24 | 1438.3 | 0.45 |
| Isovalencenol        | -4.43 | 0.28 | 0.12 | 0.88 | 84.1 | 0.94 | 0.32 | 0.03 | 0.52 | 0.09 | 0.58 | 0.06 | 0.36 | 0.05 | 0.50 | 0.38 | 0.34 | 1.70 | 0.38 | 0.23 | 1923.7 | 0.19 |
| Khusene              | -4.44 | 0.21 | 0.06 | 0.86 | 74.3 | 0.97 | 0.58 | 0.02 | 0.41 | 0.08 | 0.51 | 0.04 | 0.30 | 0.07 | 0.55 | 0.33 | 0.44 | 2.00 | 0.33 | 0.14 | 2769.5 | 0.24 |
| Khusilal             | -4.26 | 0.52 | 0.01 | 0.84 | 75.3 | 0.97 | 0.28 | 0.10 | 0.45 | 0.13 | 0.44 | 0.14 | 0.45 | 0.27 | 0.48 | 0.30 | 0.39 | 1.59 | 0.25 | 0.32 | 2679.1 | 0.55 |
| Khusimol             | -4.39 | 0.19 | 0.03 | 0.86 | 78.0 | 0.95 | 0.37 | 0.01 | 0.39 | 0.03 | 0.57 | 0.02 | 0.35 | 0.06 | 0.50 | 0.30 | 0.52 | 1.61 | 0.33 | 0.19 | 1517.5 | 0.20 |
| Khusimone            | -4.34 | 0.25 | 0.01 | 0.86 | 76.3 | 0.97 | 0.35 | 0.04 | 0.45 | 0.09 | 0.59 | 0.05 | 0.32 | 0.08 | 0.65 | 0.19 | 0.30 | 1.76 | 0.29 | 0.06 | 1600.6 | 0.48 |
| Khusinol             | -4.41 | 0.29 | 0.14 | 0.87 | 83.6 | 0.89 | 0.37 | 0.03 | 0.33 | 0.05 | 0.52 | 0.05 | 0.36 | 0.15 | 0.43 | 0.36 | 0.40 | 1.50 | 0.36 | 0.13 | 1710.5 | 0.24 |
| Khusiol              | -4.42 | 0.12 | 0.08 | 0.91 | 75.8 | 0.96 | 0.55 | 0.02 | 0.24 | 0.02 | 0.40 | 0.02 | 0.28 | 0.10 | 0.38 | 0.23 | 0.32 | 1.60 | 0.32 | 0.08 | 1738.1 | 0.13 |
| Khusitone            | -4.34 | 0.43 | 0.00 | 0.87 | 79.7 | 0.98 | 0.29 | 0.09 | 0.42 | 0.04 | 0.45 | 0.03 | 0.45 | 0.40 | 0.46 | 0.29 | 0.35 | 1.55 | 0.26 | 0.22 | 2450.7 | 0.52 |
| Khusol               | -4.39 | 0.42 | 0.06 | 0.86 | 82.3 | 0.85 | 0.27 | 0.04 | 0.48 | 0.09 | 0.53 | 0.03 | 0.44 | 0.11 | 0.57 | 0.37 | 0.44 | 1.48 | 0.36 | 0.28 | 1928.1 | 0.28 |
| Nigellidine          | -4.69 | 0.37 | 0.02 | 0.78 | 85.4 | 0.81 | 0.73 | 0.64 | 0.40 | 0.26 | 0.47 | 0.41 | 0.52 | 0.37 | 0.47 | 0.29 | 0.48 | 1.77 | 0.71 | 0.44 | 417.7  | 0.54 |
| Nootkatone           | -4.38 | 0.79 | 0.02 | 0.89 | 80.8 | 0.97 | 0.37 | 0.07 | 0.52 | 0.02 | 0.70 | 0.03 | 0.25 | 0.16 | 0.67 | 0.17 | 0.22 | 1.61 | 0.32 | 0.03 | 1950.4 | 0.56 |
| Rhinocerotinoic acid | -4.68 | 0.83 | 0.05 | 0.80 | 94.1 | 0.90 | 0.37 | 0.03 | 0.32 | 0.10 | 0.53 | 0.09 | 0.31 | 0.20 | 0.38 | 0.27 | 0.29 | 1.75 | 0.48 | 0.07 | 580.8  | 0.23 |
| Salutarisolid        | -4.46 | 0.43 | 0.04 | 0.75 | 65.4 | 0.94 | 0.08 | 0.04 | 0.42 | 0.11 | 0.68 | 0.05 | 0.42 | 0.19 | 0.60 | 0.27 | 0.20 | 1.37 | 0.26 | 0.20 | 567.6  | 0.49 |
| Salvianic acid       | -5.89 | 0.03 | 0.19 | 0.48 | 30.1 | 0.77 | 0.67 | 0.01 | 0.17 | 0.02 | 0.12 | 0.03 | 0.59 | 0.02 | 0.34 | 0.24 | 0.62 | 0.60 | 0.14 | 0.45 | 2157.9 | 0.16 |
| Spathulenol          | -4.42 | 0.18 | 0.01 | 0.83 | 79.3 | 0.98 | 0.53 | 0.06 | 0.43 | 0.08 | 0.66 | 0.02 | 0.40 | 0.19 | 0.54 | 0.27 | 0.37 | 1.57 | 0.32 | 0.16 | 1199.9 | 0.17 |
| Walburganai          | -4.47 | 0.25 | 0.01 | 0.75 | 68.9 | 0.98 | 0.13 | 0.07 | 0.43 | 0.31 | 0.57 | 0.06 | 0.31 | 0.33 | 0.49 | 0.36 | 0.35 | 1.60 | 0.23 | 0.13 | 1108.0 | 0.31 |
| Zerumbone            | -4.33 | 0.25 | 0.05 | 0.79 | 78.8 | 0.99 | 0.46 | 0.16 | 0.64 | 0.06 | 0.59 | 0.08 | 0.50 | 0.38 | 0.68 | 0.29 | 0.26 | 1.75 | 0.41 | 0.08 | 2472.5 | 0.32 |
| Reference drugs      |       |      |      |      |      |      |      |      |      |      |      |      |      |      |      |      |      |      |      |      |        |      |
| Arbidol              | -4.89 | 0.81 | 0.24 | 0.70 | 91.6 | 0.59 | 0.08 | 0.64 | 0.45 | 0.67 | 0.64 | 0.80 | 0.37 | 0.87 | 0.55 | 0.56 | 0.43 | 1.77 | 0.89 | 0.22 | 629.4  | 0.59 |
| Artemisinin          | -4.50 | 0.35 | 0.04 | 0.64 | 61.5 | 0.93 | 0.18 | 0.97 | 0.43 | 0.07 | 0.64 | 0.05 | 0.08 | 0.06 | 0.64 | 0.20 | 0.60 | 1.23 | 0.27 | 0.33 | 3025.3 | 0.39 |
| Camostat             | -5.39 | 0.57 | 0.17 | 0.39 | 78.8 | 0.67 | 0.85 | 0.08 | 0.60 | 0.06 | 0.62 | 0.17 | 0.40 | 0.06 | 0.54 | 0.42 | 0.50 | 1.27 | 0.51 | 0.25 | 1867.8 | 0.62 |
| Chloroquine          | -4.57 | 0.26 | 0.81 | 0.88 | 85.4 | 0.95 | 1.26 | 0.03 | 0.74 | 0.07 | 0.83 | 0.05 | 0.08 | 0.19 | 0.71 | 0.66 | 0.85 | 2.23 | 0.88 | 0.81 | 729.4  | 0.47 |
| Hydroxychloroquine   | -4.75 | 0.28 | 0.80 | 0.81 | 84.1 | 0.85 | 1.07 | 0.05 | 0.68 | 0.12 | 0.33 | 0.10 | 0.06 | 0.09 | 0.64 | 0.63 | 0.32 | 2.08 | 0.92 | 0.72 | 787.4  | 0.50 |

Interpretation provided by ADMETlab server: Caco-2 permeability (Green: higher than -5.15 Log); P-glycoprotein (P-gp) (Green: non-inhibitor, Red: inhibitor; Green: substrate, Red: non-substrate); Human Intestinal Absorption (HIA) (Green: HIA+, Red: HIA-); Plasma Protein Binding (PPB) (Green: > 90%, Red: < 90%); Blood–Brain Barrier (BBB) (Green: BBB+, Red: BBB-); Volume Distribution (VD) (Green: between 0.04-20 L kg<sup>-1</sup>); CYP450 (Green: non-Inhibitor, Red: inhibitor); Half-life (  $T_{1/2}$  ) (Green: < 3 hours); hERG blockers (Green: low-blockers, Red: blockers); Ames mutagenicity (Green: ames-, Red: ames+); LD50 (Green: > 501 mg Kg<sup>-1</sup>, Red: < 501 mg Kg<sup>-1</sup>); Drug Induced Liver Injury (DILI) (Green: DILI-, Red: DILI+). \* Expected probability for categorical variables.
